# Supplementary material for: The AINTEGUMENTA genes, MdANT1 and MdANT2, are associated with the regulation of cell production during fruit growth in apple (Malus × domestica Borkh.)
Source: PubMed Central journal article supplement (PMC3408378; doi:10.1186/1471-2229-12-98), 2012-06-25
Supplement: 1471-2229-12-98-S2.pdf [file 1471-2229-12-98-S2.pdf]

**Additional File 2: Growth and gene expression during fruit development in ‘Gala’.** The table displays data corresponding to Figure 2 for Fruit diameter (Figure 2A), Cell layers (Figure 2B), Relative cell production rate (RCPR; Figure 2C) and Cell area (Figure 2D). The table also displays expression data for *MdANT1* and *MdANT2* from Figure 3. Fruit diameter was not measured at 10 days after full bloom (DAFB). RCPR data were rounded off to the third decimal point. Gene expression was normalized using *MdGAPDH* and *MdACTIN*. Expression of a gene relative to its expression at 0 DAFB is presented. The mean and standard error of four biological replicates are displayed.

| DAFB | Fruit diameter (mm) | Cell layers  | RCPR (cell cell <sup>-1</sup> day <sup>-1</sup> ) | Cell area (× 1000 μm <sup>2</sup> ) | <i>MdANT1</i> (Relative expression) | <i>MdANT2</i> (Relative expression) |
|------|---------------------|--------------|---------------------------------------------------|-------------------------------------|-------------------------------------|-------------------------------------|
| 0    | 2.7 ± 0.03          | 13.7 ± 0.51  |                                                   | 0.22 ± 0.009                        | 1 ± 0.07                            | 1 ± 0.03                            |
| 7    | 3.5 ± 0.05          | 15.3 ± 0.53  | 0.02 ± 0.003                                      | 0.23 ± 0.004                        | 1.39 ± 0.17                         | 1.36 ± 0.26                         |
| 10   | -                   | 27.97 ± 0.80 | 0.20 ± 0.003                                      | 0.27 ± 0.01                         | 0.93 ± 0.17                         | 0.92 ± 0.05                         |
| 15   | 5.7 ± 0.16          | 55.1 ± 0.69  | 0.14 ± 0.006                                      | 0.39 ± 0.006                        | 1.12 ± 0.12                         | 0.97 ± 0.17                         |
| 25   | 15.5 ± 0.32         | 68.8 ± 1.02  | 0.02 ± 0.005                                      | 0.73 ± 0.006                        | 0.15 ± 0.05                         | 0.38 ± 0.07                         |
| 32   | 21.3 ± 0.22         | 76.8 ± 2.14  | 0.02 ± 0.002                                      | 1.60 ± 0.06                         | 0.47 ± 0.03                         | 0.38 ± 0.03                         |
| 39   | 26.3 ± 0.22         | 78.1 ± 1.66  | 0.002 ± 0.001                                     | 3.00 ± 0.07                         | 0.10 ± 0.03                         | 0.20 ± 0.06                         |
| 57   | 33.6 ± 0.34         | 80 ± 0.52    | 0.001 ± 0.001                                     | 5.67 ± 0.11                         | 0.11 ± 0.02                         | 0.21 ± 0.02                         |
| 86   | 54.9 ± 0.94         | 79.8 ± 0.22  | 0.000 ± 0.000                                     | 17.31 ± 0.52                        | 0.03 ± 0.01                         | 0.09 ± 0.02                         |
| 123  | 67.3 ± 1.74         | 80.3 ± 0.66  | 0.000 ± 0.000                                     | 20.67 ± 0.56                        | 0.01 ± 0.004                        | 0.004 ± 0.001                       |
