# Supplementary material for: The AINTEGUMENTA genes, MdANT1 and MdANT2, are associated with the regulation of cell production during fruit growth in apple (Malus × domestica Borkh.)
Source: PubMed Central journal article supplement (PMC3408378; doi:10.1186/1471-2229-12-98), 2012-06-25
Supplement: 1471-2229-12-98-S3.pdf [file 1471-2229-12-98-S3.pdf]

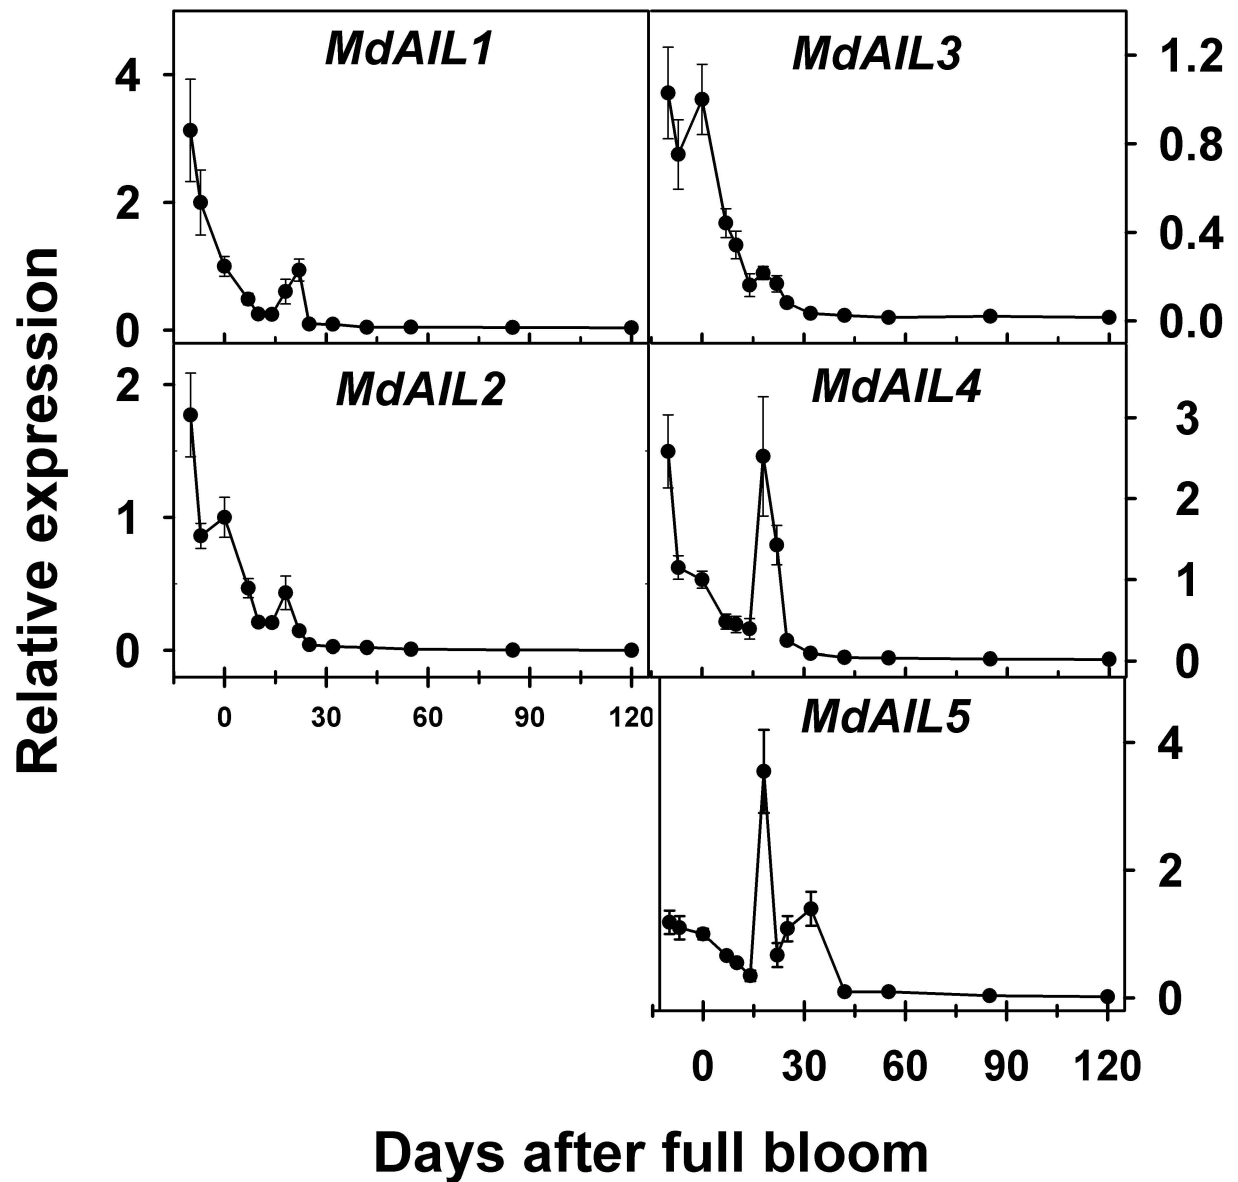

**Additional file 3: Expression of the *AIL* genes during fruit development in ‘Gala’.** The normalization factor was determined as the geometric mean of expression of *MdGAPDH* and *MdACTIN*. Fold change in expression is presented relative to expression during full bloom. Error bar represents the standard error of the mean of four biological replicates ( $n=4$ ).
