# Supplementary material for: The AINTEGUMENTA genes, MdANT1 and MdANT2, are associated with the regulation of cell production during fruit growth in apple (Malus × domestica Borkh.)
Source: PubMed Central journal article supplement (PMC3408378; doi:10.1186/1471-2229-12-98), 2012-06-25
Supplement: 1471-2229-12-98-S4.pdf [file 1471-2229-12-98-S4.pdf]

**Additional File 4: Growth and gene expression in thinned [A] and un-thinned fruit [B] of ‘Golden Delicious Smoothie’.** The table shows data corresponding to Figure 4 for Fruit diameter (Figure 4A), Cell layers (Figure 4B), Relative cell production rate (RCPR; Figure 4C) and Cell area (Figure 4D). The table also shows expression data for *MdANT1* and *MdANT2* from Figure 5. Fruit diameter was not measured at 10 days after full bloom (DAFB). RCPR data were rounded off to the third decimal point. Expression of a gene is presented relative to its expression at 0 DAFB in thinned fruit. Gene expression was normalized using *MdGAPDH* and *MdACTIN*. The mean and standard error of four biological replicates are presented.

**A.**

| DAFB | Fruit diameter (mm) | Cell layers  | RCPR (cell cell <sup>-1</sup> day <sup>-1</sup> ) | Cell area (× 1000 μm <sup>2</sup> ) | <i>MdANT1</i> (Relative expression) | <i>MdANT2</i> (Relative expression) |
|------|---------------------|--------------|---------------------------------------------------|-------------------------------------|-------------------------------------|-------------------------------------|
| 0    | 3.2 ± 0.03          | 12.7 ± 0.73  |                                                   | 0.30 ± 0.01                         | 1.00 ± 0.21                         | 1.00 ± 0.13                         |
| 8    | 5.5 ± 0.03          | 23.7 ± 0.60  | 0.09 ± 0.006                                      | 0.38 ± 0.002                        | 1.17 ± 0.22                         | 1.67 ± 0.39                         |
| 11   | -                   | 42.7 ± 0.60  | 0.20 ± 0.013                                      | 0.48 ± 0.05                         | 0.91 ± 0.16                         | 0.85 ± 0.10                         |
| 18   | 11.9 ± 0.27         | 76.3 ± 0.89  | 0.09 ± 0.003                                      | 0.58 ± 0.01                         | 0.71 ± 0.18                         | 1.22 ± 0.14                         |
| 25   | 20.2 ± 0.39         | 120.8 ± 1.07 | 0.06 ± 0.003                                      | 1.47 ± 0.04                         | 1.04 ± 0.2                          | 2.92 ± 0.62                         |
| 32   | 26.5 ± 0.29         | 122.4 ± 1.05 | 0.002 ± .001                                      | 3.16 ± 0.11                         | 0.29 ± 0.08                         | 0.69 ± 0.08                         |
| 50   | 41.0 ± 0.4          | 124.1 ± 0.34 | 0.001 ± 0.001                                     | 5.16 ± 0.17                         | 0.12 ± 0.02                         | 0.30 ± 0.05                         |
| 79   | 59.9 ± 0.19         | 122.5 ± 0.28 | 0.000 ± 0.000                                     | 18.13 ± 0.74                        | 0.03 ± 0.007                        | 0.06 ± 0.02                         |
| 128  | 78.7 ± 0.55         | 125.0 ± 1.73 | 0.000 ± 0.000                                     | 24.89 ± 0.46                        | 0.21 ± 0.05                         | 0.06 ± 0.02                         |
| 150  | 83.0 ± 0.25         | 123.5 ± 0.34 | 0.000 ± 0.000                                     | 45.08 ± 2.33                        | 0.01 ± 0.002                        | 0.02 ± 0.003                        |

**B.**

| DAFB | Fruit diameter (mm) | Cell layers | RCPR (cell cell <sup>-1</sup> day <sup>-1</sup> ) | Cell area (× 1000 μm <sup>2</sup> ) | <i>MdANTI</i> (Relative expression) | <i>MdANT2</i> (Relative expression) |
|------|---------------------|-------------|---------------------------------------------------|-------------------------------------|-------------------------------------|-------------------------------------|
| 0    | 3.1 ± 0.04          | 12.8 ± 0.19 |                                                   | 0.32 ± 0.01                         | 0.97 ± 0.16                         | 0.76 ± 0.09                         |
| 8    | 5.6 ± 0.18          | 23.4 ± 0.44 | 0.09 ± 0.003                                      | 0.38 ± 0.01                         | 1.11 ± 0.25                         | 1.62 ± 0.5                          |
| 11   | -                   | 41.6 ± 0.50 | 0.19 ± 0.006                                      | 0.46 ± 0.01                         | 1.06 ± 0.18                         | 1.15 ± 0.21                         |
| 18   | 11.1 ± 0.78         | 73.5 ± 0.69 | 0.07 ± 0.006                                      | 0.58 ± 0.01                         | 0.80 ± 0.16                         | 1.12 ± 0.17                         |
| 25   | 17.4 ± 0.98         | 86.0 ± 1.19 | 0.01 ± 0.004                                      | 1.4 ± 0.03                          | 0.55 ± 0.16                         | 0.62 ± 0.09                         |
| 32   | 23.5 ± 0.86         | 90.3 ± 0.49 | 0.004 ± 0.003                                     | 3.7 ± 0.40                          | 0.10 ± 0.02                         | 0.38 ± 0.06                         |
| 50   | 36.5 ± 0.32         | 92.1 ± 0.24 | 0.001 ± 0.001                                     | 5.8 ± 0.11                          | 0.13 ± 0.02                         | 0.16 ± 0.03                         |
| 79   | 50.6 ± 1.16         | 92.0 ± 0.41 | 0.000 ± 0.000                                     | 19.9 ± 1.24                         | 0.02 ± 0.01                         | 0.05 ± 0.01                         |
| 128  | 67.1 ± 1.05         | 92.1 ± 0.14 | 0.000 ± 0.000                                     | 22.3 ± 0.54                         | 0.16 ± 0.03                         | 0.05 ± 0.01                         |
| 150  | 71.8 ± 1.41         | 93.2 ± 0.3  | 0.000 ± 0.000                                     | 40.8 ± 1.82                         | 0.01 ± 0.002                        | 0.01 ± 0.003                        |
