# Supplementary material for: The AINTEGUMENTA genes, MdANT1 and MdANT2, are associated with the regulation of cell production during fruit growth in apple (Malus × domestica Borkh.)
Source: PubMed Central journal article supplement (PMC3408378; doi:10.1186/1471-2229-12-98), 2012-06-25
Supplement: 1471-2229-12-98-S6.pdf [file 1471-2229-12-98-S6.pdf]

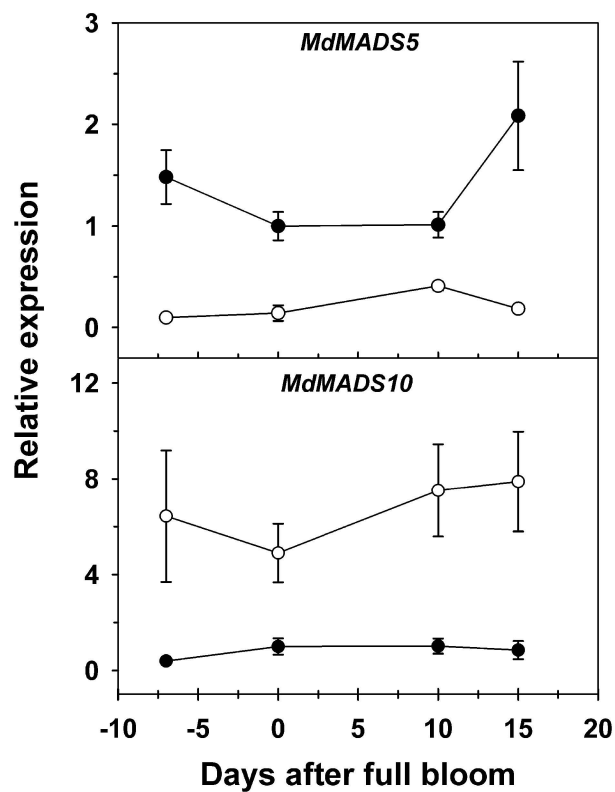

**Additional file 6: Expression of *MdMADS5* and *MdMADS10* in the core and the cortex tissues of ‘Gala’ apple during flower and early fruit development.** Closed circles represent cortex tissues and open circles represent core tissues. Core and cortex tissues were separated using laser capture microdissection. Gene expression was determined using quantitative RT-PCR and was normalized using *MdACTIN*. Expression of the gene is presented as the fold-change in relation to its expression at 0 DAFB. Error bar represents standard error of the mean of three biological replicates.
