# Supplementary material for: The AINTEGUMENTA genes, MdANT1 and MdANT2, are associated with the regulation of cell production during fruit growth in apple (Malus × domestica Borkh.)
Source: PubMed Central journal article supplement (PMC3408378; doi:10.1186/1471-2229-12-98), 2012-06-25
Supplement: 1471-2229-12-98-S7.pdf [file 1471-2229-12-98-S7.pdf]

**Additional file 7: List of primer sequences used for sequencing *MdANT1* and *MdANT2*.**

| <b>Primer Name and Orientation</b> | <b>Type of Primer</b>                                              | <b>Primer Sequence 5'-3'</b> |
|------------------------------------|--------------------------------------------------------------------|------------------------------|
| NANT Reverse                       | Gene specific primer for PCR amplification of <i>MdANT1</i> 5' end | CCAATGCCGTTGAGAAGGAAGGG      |
| NANT' Reverse                      | Gene specific primer for PCR amplification of <i>MdANT2</i> end    | TCCTCCAATGCCATTGAGAATGAGAGA  |
| DP1 Forward                        | Degenerate primer for 5' sequencing                                | ATGCCRCTNARRTCNGAYGG         |
| DP2 Forward                        | Degenerate primer for 5' sequencing                                | CCNAARCTNGARGAYTTYTT         |
| GSANT1 Reverse                     | Gene specific primer for PCR amplification of <i>MdANT1</i>        | GGGTTATGCTCAATGGCCAGG        |
| GSANT2 Reverse                     | Gene specific primer for PCR amplification of <i>MdANT2</i>        | TTATACTCAATGGCTGGCGCTG       |
| PANTF1 Forward                     | Primer designed from Peach <i>ANT</i>                              | GTTCTCACTCTCACCCACATGAA      |
| PANTF2 Forward                     | Primer designed from Peach <i>ANT</i>                              | GTTGCTTCTGACCCTCATCAGCAT     |

|                       |                                                                     |                                |
|-----------------------|---------------------------------------------------------------------|--------------------------------|
| PANTF3<br>Forward     | Primer designed<br>from Peach<br><i>ANT</i>                         | GGTCAGGCTTCTTCAGCTGCTG         |
| PANTF4<br>Forward     | Primer designed<br>from Peach<br><i>ANT</i>                         | ATGAATGATCACAATAATAACAACAATGGA |
| PANTF5<br>Forward     | Primer designed<br>from Peach<br><i>ANT</i>                         | AACTGGTTGGGGTTCTCACTCTC        |
| PANTR1<br>Reverse     | Primer designed<br>from Peach<br><i>ANT</i>                         | GTCACGCCTCGGTACATTGAAGC        |
| PANTR2<br>Reverse     | Primer designed<br>from Peach<br><i>ANT</i>                         | CCAAGATAAAGATCCTTGTCCAGC       |
| PANTR3<br>Reverse     | Primer designed<br>from Peach<br><i>ANT</i>                         | TCAAAGTTGGTGACCGCATTGCG        |
| S1Primer<br>Forward   | Forward primer<br>for full length<br>sequencing of<br><i>MdANT1</i> | CTGTCTTTAGAGAGAGAAACACAGTG     |
| S2Primer<br>Forward   | Forward primer<br>for full length<br>sequencing of<br><i>MdANT2</i> | TGTGAGTGCATAGAAGGAAGTGTAT      |
| S2PrimerR1<br>Reverse | Reverse primer<br>for full length<br>sequencing of<br><i>MdANT2</i> | CTCCACTAATTACTTAACCCTCACCTC    |
| S2PrimerR2<br>Reverse | Reverse primer<br>for full length<br>sequencing of                  | CATGCAAAAATCTTTGAAGGCATTTCAG   |

|                       |                                                                     |                               |
|-----------------------|---------------------------------------------------------------------|-------------------------------|
|                       | <i>MdANT2</i>                                                       |                               |
| S1PrimerR1<br>Reverse | Reverse primer<br>for full length<br>sequencing of<br><i>MdANT1</i> | AGAATTCCTCCACTAATTACTTACCCTAA |
| S1PrimerR2<br>Reverse | Reverse primer<br>for full length<br>sequencing of<br><i>MdANT1</i> | AATTTCTCCATTTTTCCTTGTTCAAT    |
