# Supplementary material for: The AINTEGUMENTA genes, MdANT1 and MdANT2, are associated with the regulation of cell production during fruit growth in apple (Malus × domestica Borkh.)
Source: PubMed Central journal article supplement (PMC3408378; doi:10.1186/1471-2229-12-98), 2012-06-25
Supplement: 1471-2229-12-98-S8.pdf [file 1471-2229-12-98-S8.pdf]

**Additional file 8: List of primers used for analysis of *ANTs*, *AILs*, and *MdMADS*' gene expression with qRT-PCR.**

| <b>Gene</b>     | <b>Primer Orientation</b> | <b>Primer Sequence (5'-3')</b> |
|-----------------|---------------------------|--------------------------------|
| <i>MdAIL1</i>   | Forward                   | CCTCAGAACCCATGCGATGATCTTG      |
|                 | Reverse                   | GCCATGTTGTTCTGGTCCATGGAA       |
| <i>MdAIL2</i>   | Forward                   | CATAACACGGTATGATGTGGACCGA      |
|                 | Reverse                   | TCCCCATTGCCGATTTGCGAA          |
| <i>MdAIL3</i>   | Forward                   | CTTCGGCCAACGCACATCCATTTA       |
|                 | Reverse                   | AGATCGTAGGCTCTTGCTGCCTTT       |
| <i>MdAIL4</i>   | Forward                   | GCGGCCATAAAGTTTAGGGGCATT       |
|                 | Reverse                   | TCTGCTCTTCAGCTTCGAGTGAGAG      |
| <i>MdAIL5</i>   | Forward                   | CTCCCTTCTTGTCTGCACCACTTC       |
|                 | Reverse                   | TCTTCGGGCTGAAATAAAGCGAACTTG    |
| <i>MdANT1</i>   | Forward                   | CACCAAGGTGATCGAACCTAACATCCTG   |
|                 | Reverse                   | CCAATGCCGTTGAGAAGGAAGGG        |
| <i>MdANT2</i>   | Forward                   | CCAAGGTGATCGAACCTAACATTGCAG    |
|                 | Reverse                   | TCCTCCAATGCCATTGAGAATGAGAGA    |
| <i>MdMADS5</i>  | Forward                   | ATCCATCTCTGAGCTTCAGAGAAAGAG    |
|                 | Reverse                   | GCTGTGGAAGCAGGTCAAGGC          |
| <i>MdMADS10</i> | Forward                   | CACTTAATGGGAGATGCCTTGAGCACT    |
|                 | Reverse                   | GCCTCTCGACTTCTGATACCTTAGTTCG   |
